# Supplementary material for: iDesignGPT: large language model agentic workflows boost engineering design
Source: Research Square preprint supplement (doi:10.21203/rs.3.rs-5670522/v1), 2025-01-07
Supplement: Supplementary file 1 [file b7a32f50af8469f063905004.docx]

Supplementary information for:

iDesignGPT: large language model agentic workflows boost engineering design

*Songkai Liu1, Yanqing Shen2, Yilun Zhang1, Zhangli Hou1, Xin Wang1*, Jianxi Luo3, Zhinan Zhang1,4**

*1School of Mechanical Engineering, Shanghai Jiao Tong University, Shanghai 200240*

*2Herbert Wertheim College of Engineering, University of Florida, Gainesville 32611*

*3Department of Systems Engineering, City University of Hong Kong, Hong Kong 999077*

*4State Key Laboratory of Mechanical System and Vibration, Shanghai Jiao Tong University, Shanghai 200240*

**Table of Contents**

**Supplementary Note S1.** Methodology for calculating coverage and diversity metrics in design space analysis

**Supplementary Note S2.** Methodology for evaluating design novelty using semantic vector analysis

**Supplementary Note S3.** Design challenge details, expert profiles, and scoring criteria

**Supplementary Note S4.** Questionnaire design and user experience scoring system

**Supplementary Note S5.** Agent roles and flows

**Supplementary Note S6.** Temperature parameter optimization results

**Supplementary Figure S1.** Visualization of the design challenges, highlighting their diversity across key dimensions

**Supplementary Figure S2.** Example scoring template used for evaluating iDesignGPT’s generated designs

**Supplementary Figure S3.** Star Flow Implementation for Brainstorming

**Supplementary Figure S4.** Loop Flow Implementation for Functional Decomposition

**Supplementary Figure S5.** Sequential Flow Implementation for TRIZ Conflict Resolution

**Supplementary Table S1.** Summary of the six selected design challenges

**Supplementary Table S2.** Expert profiles

**Supplementary Table S3.** Participant Information Summary

**References**

Supplementary Note S1. Methodology for calculating coverage and diversity metrics in design space analysis

To evaluate the extent and variability of the design space explored during the Concept Generation phase, two quantitative metrics—coverage and diversity—were computed. These metrics were derived from the embedding representations of design solutions using Sentence-BERT1 and analyzed within the reduced two-dimensional space obtained through Uniform Manifold Approximation and Projection2 (UMAP).

Embedding Generation and Dimensionality Reduction

The design solutions across different methods and modules were represented as high-dimensional embeddings. Each solution was encoded into a vector , where is the dimensionality of the embedding space. The embeddings were obtained using the Sentence-BERT model. Subsequently, dimensionality reduction was applied to project these embeddings into a two-dimensional space , enabling geometric and statistical analyses. The reduced embeddings for a given set of solutions are denoted as .

The UMAP algorithm was employed for dimensionality reduction, which preserves the local and global relationships of high-dimensional embeddings in the reduced space.

Coverage Metric

Coverage quantifies the spatial extent of the design space explored by a specific set of solutions . For a set of embeddings corresponding to a particular design method or a combination of methods, the coverage is defined as the area of the convex hull enclosing all points in :

where the convex hull is the smallest convex polygon containing all points in .

For modules or subsets of solutions with fewer than three points, the convex hull cannot be computed, and the coverage is set to zero. This ensures that the metric remains valid even for sparsely populated subsets of the design space.

Diversity Metric

Diversity measures the variability of solutions within a specific module or across all solutions associated with a design method. For a set of embeddings corresponding to module , diversity is calculated as the average pairwise Euclidean distance between all pairs of embeddings in :

where​ is the Euclidean distance between embeddings ​ and ​ in module .

The overall diversity across all modules is computed as the mean diversity over all modules :

where is the total number of modules.

Metric Calculation Across Design Phases

The metrics were calculated at different levels of granularity:

1. Method-level metrics: The embeddings considered all solutions generated within a specific design method.
2. Cumulative metrics: The embeddings included all solutions generated cumulatively up to a given method (e.g., initial + Brainstorm + SCAMPER).
3. Module-level metrics: The embeddings ​ were restricted to solutions within a specific module across all methods.

This hierarchical approach allowed us to track how the design space evolved over successive methods and to assess variability within individual modules.

Supplementary Note S2. Methodology for evaluating design novelty using semantic vector analysis

This section details the methodology used to evaluate the novelty of design solutions during the Concept Generation phase. Novelty was quantified using semantic vector analysis, leveraging embeddings generated by Sentence-BERT and their similarity to initial solutions. The methodology aligns with the approach outlined in Supplementary Note S1 for embedding generation and dimensionality reduction but introduces additional metrics specific to novelty.

Embedding Generation and Dimensionality Reduction

The embedding representations of design solutions were generated using the Sentence-BERT model. To maintain consistency with the novelty evaluation framework, these embeddings were analyzed without dimensionality reduction, ensuring that the full semantic information was preserved. For comparison with initial design solutions, similarity calculations were performed directly in the high-dimensional embedding space.

Novelty Metrics

Novelty was assessed at the module level and at the method level based on the similarity of solutions to those in the initial design phase. Two specific novelty metrics were computed:

| **Novelty metrics** | **interpretation** |
| --- | --- |
| Average Novelty | Reflects the overall deviation of solutions from the initial set. |
| Max Novelty | Identifies the most distinct solution compared to the initial set, highlighting extreme innovation. |

For a given module , the novelty metrics were defined as follows:

1. Average Novelty:

Let denote the embeddings of solutions in module at the current phase and ​ denote the embeddings of solutions in the same module during the initial design phase. The average novelty for module is calculated as:

where represents the cosine similarity between embeddings and :

2. Max Novelty:

Max novelty captures the most distinct solution in module by identifying the minimum similarity to any initial solution:

For each method, the module-level novelties and ​ were aggregated across all modules :

|  |  |
| --- | --- |
|  |

Metric Calculation Across Design Phases

Novelty metrics were calculated at the following levels:

1. Module-level metrics: Evaluating novelty within specific modules compared to their initial solutions.
2. Method-level metrics: Aggregating module-level novelties to assess the overall innovation introduced by each method.
3. Cumulative metrics: Including all solutions generated up to a given phase to evaluate how novelty evolved as methods were combined.

This hierarchical framework ensured a comprehensive understanding of novelty at both granular and holistic levels.

Supplementary Note S3. Design challenge details, expert profiles, and scoring criteria

Design challenge details

To evaluate iDesignGPT’s performance, six publicly available engineering design challenges were selected. These challenges were sourced from reputable organizations, including NASA and the U.S. Department of Energy (DOE), and were chosen for their diversity in scale, complexity, innovation demands, technical maturity requirements, and design freedom. Importantly, these challenges were released after October 2023, ensuring that no prior data exposure could influence model performance. This timeline was validated using the data contamination analysis described in the main text, ensuring that iDesignGPT’s problem-solving abilities were assessed without bias.

Details of the six design challenges are summarized in Supplementary Table S1, including their abbreviated names, full titles, affiliated organizations, and relevant links. Additionally, Supplementary Figure S1 provides a visual overview of the key dimensions of these challenges, including scale, complexity, innovation demands, technical maturity requirements, and design freedom.

The complete design documents used as input for iDesignGPT are publicly available on GitHub at [<https://github.com/Songkai-Liu-SJTU/iDesignGPT/tree/main/data/Scoring_Material> ].

Expert profiles

Six experts with diverse design backgrounds were invited to participate in the evaluation process. Their profiles are summarized in Supplementary Table S2, which includes information on their years of design experience, current industries, and highest academic qualifications. These experts represent a mix of academic and industry perspectives, ensuring a balanced and comprehensive evaluation of iDesignGPT’s performance. The table also highlights the specific domains of expertise for each expert, ranging from mechanical engineering to artificial intelligence.

Scoring criteria

Final conceptual designs generated by iDesignGPT were evaluated independently by three experienced design experts across six dimensions:

1. Novelty: The uniqueness of the design, compared to existing solutions.
2. Originality: The degree of difference between the design and existing solutions.
3. Rationality: Judgment based on project requirements, assessing the rationality and logical clarity of functional modules.
4. Technical Maturity: The extent to which the technology required for the design is ready and mature under current conditions.
5. Modularity: The complexity of the design in terms of module quantity and functionality.
6. Efficiency: The balance between cost and performance, reflecting the cost-effectiveness of the design.

Each dimension was scored on a 5-point Likert scale (1 = very poor, 5 = excellent, except for Technical Maturity). Detailed criteria can be found in Supplementary Figure S2. For designs where inter-expert score discrepancies exceeded a standard deviation of 1, two additional experts were invited to reassess and discuss the scores. Final scores were determined through collaborative deliberation to ensure fairness and accuracy.

An example of the scoring template is illustrated in Supplementary Figure S2, which outlines the evaluation criteria and scoring format. The scoring process and example templates are also available on GitHub at [<https://github.com/Songkai-Liu-SJTU/iDesignGPT/tree/main/data/User_Evaluation>], inviting further community participation for transparency and validation.

Supplementary Note S4. Questionnaire design and user experience scoring system

The Creativity Support Index

The Creativity Support Index3 (CSI) was used to evaluate participants’ perceptions of how iDesignGPT supported their creativity during the design process. The index consists of four dimensions, each scored on a 5-point Likert scale, where a higher score indicates greater satisfaction with the system. The dimensions are:

| **Dimension** | **Question** |
| --- | --- |
| Goal Satisfaction | How much do you agree that the system helped you find at least one design that met your goals? |
| Exploration | How much do you agree that the system supported you in fully exploring the potential design space? |
| Enjoyment | How much do you agree that you enjoyed working with the system? |
| Control | How much do you agree that you felt in control of the generated designs? |

NASA Task Load Index

NASA Task Load Index4 (NASA-TLX) was employed to assess the cognitive and task demands experienced by participants while using iDesignGPT. Scores on each dimension were also recorded on a 5-point Likert scale, with higher scores indicating greater perceived task load (or worse performance). The dimensions evaluated are as follows:

| **Dimension** | **Question** |
| --- | --- |
| Mental Demand | How much mental pressure did you feel while completing this task? |
| Temporal Demand | How rushed or hurried did you feel while working on this task? |
| Performance | How successful do you feel your design was in achieving the task goals? |
| Effort | How much effort did you feel you expended to complete this task? |
| Frustration | How much frustration or dissatisfaction did you feel during this task? |

Workflow-Specific Metrics

To supplement the standard indices, we developed a set of Workflow-Specific Metrics tailored to evaluate the unique aspects of the iDesignGPT workflow. Each metric was scored on a 5-point Likert scale, with higher scores indicating greater agreement with the statements provided. The metrics are:

| **Dimension** | **Question** |
| --- | --- |
| Clearer Design Flow | How much do you agree that iDesignGPT clarified your design thinking? |
| Information Overload | How much do you agree that you felt overwhelmed by information during the design process? |
| Uncovered Ignored Needs | How much do you agree that iDesignGPT helped identify needs you had overlooked during analysis? |
| Matched Relevant Info | How much do you agree that iDesignGPT matched relevant information to your requirements? |
| Useful for Concept Generation | How much do you agree that iDesignGPT’s analysis was helpful for generating design solutions? |
| Helpful for Decision-Making | How much do you agree that iDesignGPT’s analysis assisted in decision-making during concept selection? |
| Preferred Process Explanations | How much do you agree that you preferred iDesignGPT’s process explanations over its final recommendations? |

Participants Information

To evaluate the collaborative interaction between participants and iDesignGPT, 11 individuals were recruited, including undergraduate students, graduate students, and engineers/researchers. All participants had prior experience with large language models (LLMs) such as ChatGPT. Rather than selecting from predefined challenges, participants proposed their own design tasks, allowing for a diverse range of evaluations tailored to their specific interests and expertise.

Before testing, all participants completed a standardized training session to familiarize themselves with iDesignGPT’s functionalities. Following their interactions, participants independently completed the evaluation questionnaires described in Supplementary Note S3.

Detailed participant information is summarized in Supplementary Table S3, which includes:

| **Column name** | **Description** |
| --- | --- |
| Role | Categorized as undergraduate student, graduate student, or engineer/researcher. |
| Proposed Task | The design challenge proposed by the participant. |
| Total Score | Aggregated scores based on the questionnaire responses (CSI, NASA-TLX and Workflow-Specific Metrics). |
| Qualitative Evaluation | Participants’ free-text feedback on their experience with iDesignGPT, including insights into which features inspired them, what they found most helpful, and areas for potential improvement. |

Scoring System Overview

The scoring system was designed to ensure a robust and unbiased evaluation of iDesignGPT’s usability and impact. The process consisted of three key steps:

1. Independent Scoring: Participants independently completed the questionnaire after their interactions with iDesignGPT. Responses were anonymized and recorded for analysis.
2. Result Validation: To assess the reliability of the scoring system, internal consistency was evaluated using Cronbach's alpha across all questionnaire dimensions. The calculated value of indicates strong reliability, reflecting consistent responses across participants. This suggests that the scoring dimensions effectively captured the participants’ experiences with iDesignGPT.
3. Community Access: To promote transparency, the questionnaire template and anonymized participant responses are publicly available on GitHub [<https://github.com/Songkai-Liu-SJTU/iDesignGPT/tree/main/data/Question-naire>]. External researchers are encouraged to validate the results and replicate the evaluation process.

Supplementary Note S5. Agent roles and flows

To facilitate diverse design methods, three primary workflow topologies—Star Flow, Loop Flow, and Sequential Flow—were implemented within the iDesignGPT framework. Each topology incorporates specific agent roles and systematic task flows to ensure flexibility, precision, and robustness when tackling complex design challenges. The detailed agent roles and task flows are described below and are also available at <https://github.com/Songkai-Liu-SJTU/iDesignGPT/tree/main/code/agent>.

Star Flow for Brainstorming Scenarios

**Workflow Description:**

The Star Flow is optimized for Brainstorming5 tasks requiring diverse expert perspectives and collaborative refinement of design insights. A host agent serves as the central coordinator, while multiple expert agents contribute targeted responses during iterative discussion rounds.

**Workflow Implementation (**Supplementary Figure S3**):**

1. At the start of the process, the host agent defines the identities and responsibilities of each expert agent based on the design problem.
2. The host agent presents targeted questions to each expert agent, collects their responses, and compiles a summary after each discussion round.
3. Expert agents maintain a shared conversation history, enabling refinement and integration of insights throughout multiple iterations.
4. The workflow concludes when the host agent generates a final summary, incorporating the most refined design insights.

**Agent Roles:**

- **Host Agent:** Coordinates the discussion, formulates questions, integrates insights, and ensures the progression of brainstorming sessions.
- **Expert Agents:** Provide domain-specific perspectives and refine their responses iteratively based on shared discussion history.

This collaborative structure ensures that brainstorming remains focused while fostering creative exploration and cross-agent refinement.

Loop Flow for Systematic Validation Tasks

**Workflow Description:**

The Loop Flow is designed for tasks requiring iterative validation and logical reasoning, such as functional decomposition6. A generator agent and a checker agent work collaboratively to produce and validate outputs, ensuring accuracy and mitigating risks of hallucination.

**Workflow Implementation (**Supplementary Figure S4**):**

- 1. The generator agent produces initial outputs based on the design requirements or user input.
  2. The checker agent evaluates these outputs against predefined validation criteria.
  3. If the outputs fail validation, the checker provides feedback for improvement, and the generator revises the results accordingly.
  4. This iterative process continues until the outputs meet all validation checks.
  5. Once validated, the workflow proceeds to downstream tasks such as drawing, module definition, or further refinement.

**Agent Roles:**

- **Generator Agent:** Produces outputs such as functional decomposition diagrams or logical flowcharts based on user inputs and task prompts.
- **Checker Agent:** Systematically evaluates outputs for accuracy and completeness, identifying errors and providing targeted feedback for iterative improvement.

This workflow ensures robust design outputs by systematically addressing issues such as overgeneralization or reasoning hallucinations.

Sequential Flow for Stepwise methodologies

**Workflow Description:**

The Sequential Flow supports stepwise methodologies, such as the TRIZ7 (Theory of Inventive Problem Solving) approach, which systematically applies predefined principles to resolve design conflicts.

**Workflow Implementation (**Supplementary Figure S5**):**

1. A guider agent formats the features and conflicts involved in the design task, sending them to a JavaScript retrieval program.
2. The retrieval program queries the TRIZ principle database and identifies applicable conflict-resolution principles.
3. The identified principles are cross-referenced and applied by an analyst agent to generate potential solutions.
4. The solutions undergo evaluation, with user input determining further refinements or satisfaction.

**Agent Roles:**

- **Guider Agent:** Formats design features and conflicts into a structured input for principle retrieval.
- **Retrieval Program:** Interfaces with the TRIZ database to fetch relevant principles.
- **Analyst Agent:** Applies the retrieved principles to generate context-specific solutions and recommendations.

By streamlining the retrieval and application of TRIZ principles, this workflow provides designers with structured, efficient, and actionable solutions to complex design challenges.

Supplementary Note S6. Temperature parameter optimization results

Introduction to Temperature Parameter Testing

The temperature parameter in large language models (LLMs) like GPT-4o controls the randomness of generated outputs, influencing response creativity and diversity. Conventionally, the temperature ranges from 0 to 1 in standard implementations such as OpenAI’s API. However, in this study, we employed a FastGPT platform, where the temperature parameter is rescaled to a range of 0 to 10. A higher temperature results in more varied and creative outputs, while a lower temperature generates deterministic and focused responses.

This supplementary note details the testing process for temperature settings to optimize the performance of iDesignGPT when interacting with users. Based on the analysis, we identified the optimal temperature setting and refined prompt engineering strategies to ensure high-quality, contextually relevant outputs.

Testing Setup and Procedure

1. **Objective**: To determine the effect of different temperature values (0–10) on response quality, clarity, and user guidance.
2. **Prompt Design**: A standardized prompt was used to simulate a design consulting scenario, where the system guides users in defining their design fields, functionalities, special requirements, and other contextual details:

| *You are a design consultant. Your task is to gather information about the user’s design field, desired functionalities, and any special requirements.*  *First-time users of this tool may feel nervous, so you should guide them through their thought process.*  *Once you believe sufficient information has been gathered, inform the user that they can switch modes to request the [Customer Requirements List].* |
| --- |

1. **Test Cases**: The following user input was provided to maintain consistency across temperature settings:

| *I want you to catalyze a breakthrough solution to design and build the world’s first compact, autonomy-enabled rescue aircraft that is safe and simple to fly.* |
| --- |

1. **Temperature Range**: Responses were generated at temperature settings of 0, 5, and 10, representing low, medium, and high randomness.
2. **Platform**: All tests were conducted using GPT-4o through the FastGPT platform.

Results

The responses at different temperature levels (0, 5, 10) were evaluated for their structure, level of detail, and coherence. Detailed outputs can be accessed on the GitHub repository [<https://github.com/Songkai-Liu-SJTU/iDesignGPT/tree/main/data/Temperature_Parameter_Optimization_Results>]. To illustrate the progression of response quality, the key excerpts from outputs at temperatures 0, 5, and 10 are presented below.

| **Temperature** | **Response Excerpt** | **Evaluation** |
| --- | --- | --- |
| 0 | *“What key functionalities do you want the rescue aircraft to have? For example, GPS guidance, autonomous take-off and landing, or obstacle avoidance?”* | The response was overly rigid, consisting of repetitive clarifying questions without progression. |
| 5 | *“Let’s consider the functionalities step by step: (1) autonomy features—GPS navigation, obstacle avoidance, emergency landing capabilities; (2) user simplicity—intuitive controls...”* | Balanced and detailed response, providing structured guidance while encouraging exploration. |
| 10 | *“When designing an autonomy-enabled rescue aircraft, we need to break it down into multiple aspects: Are we focusing on avionics, materials, software design, human interface systems...”* | The response was verbose and unstable, including redundant content and occasional incoherence. |

The key observations are summarized below:

| **Temperature** | **Response Characteristics** |
| --- | --- |
| 0 | Highly structured and focused. The response was concise, providing clear and stepwise guidance but lacking creative elaboration. |
| 5 | Balanced output. The response was structured yet detailed, offering prompts that effectively guided user thought while incorporating exploratory elements. |
| 10 | Overly verbose and divergent. Responses included redundant or speculative content, occasionally introducing inconsistencies and instability in output. |

Comparative Analysis

The testing revealed that a **temperature setting of 5** provided the most effective balance between response quality, creativity, and coherence. Responses at this setting were:

- **Structured and well-organized**: Prompts were presented step by step, providing logical progression.
- **Exploratory yet focused**: The system encouraged users to elaborate on their ideas without introducing irrelevant or speculative content.
- **Engaging and user-friendly**: Responses successfully guided the user while mitigating the potential intimidation associated with first-time tool use.

At the temperature extremes:

- **Temperature 0** produced rigid and deterministic outputs, suitable for highly constrained tasks requiring precision but lacking creativity.
- **Temperature 10** resulted in incoherent and unstable outputs, making it less suitable for structured design consulting workflows.

Prompt Refinement and Optimization

Following the temperature evaluation, the prompt was further refined to adopt a more detailed, structured approach using the Chain-of-Thought (CoT) framework. The refined prompt systematically guides the user through key design considerations:

| *You are a design consultant. Your task is to gather the user’s design field, desired functionalities, and any special requirements. First-time users of this tool may feel nervous, so you should guide them through their thought process and provide inspiring suggestions. Use the Chain-of-Thought technique to guide the user step by step.*  ***Step-by-Step Method****:*   1. ***Design Field****:*    - *Please specify the design field you are focusing on. For example, are you concentrating on product design, industrial design, UI/UX design, architecture, or another area? Consider specific subfields and your areas of interest.* 2. ***Desired Functionalities****:*    - *Let us think about the primary functions and goals you wish to achieve. What problems or needs should this design address? For example, functional features, user experience, and interaction design. Please describe these goals in detail.* 3. ***Special Requirements****:*    - *Are there any specific requirements or constraints? For instance, budget limitations, material choices, environmental conditions, regulatory requirements, or specific target users and market needs. Consider how these constraints influence the design.* 4. ***Inspiration and References****:*    - *Think about whether there are any sources of inspiration or reference projects that can help us better understand your vision. These could include design styles you admire, successful case studies, or specific functional implementations.* 5. ***Existing Challenges****:*    - *Finally, reflect on any technical or operational challenges you face in the design process. These may include limitations in manufacturing techniques, difficulties in technical implementation, or changing market and user demands. Please describe these challenges in detail and consider possible solutions.*   ***Additional Considerations****:*   - ***Target Users****:*   - *Who is the intended audience for this design? What are their needs and expectations? Understanding the target users can help us better define the design’s functionalities and experience.* - ***Market Needs****:*   - *Are there existing products or designs in the market? How will your design differentiate itself? What are its unique selling points or value propositions? Analyze the market competition and your design’s uniqueness.*   ***Note****: Please do not modify the term "[Customer Requirements List]," as it refers to a predefined module.* |
| --- |

The refined prompt was tested with the optimized temperature setting of 5, resulting in stable and high-quality responses：

| *This sounds like an incredibly engaging and challenging project! Let’s work together step by step to clarify your requirements and vision. Through a series of guiding questions, we can better define and plan your design proposal.*  ***1. Design Field****: Please provide details about the design field you are focusing on. From your description, it seems we are exploring* ***new aircraft design****. Specifically:*   - *Are you focusing on aerospace design, industrial design, or a combination of both?* - *Within this field, do you have specific subfields or areas of interest, such as* ***flight control systems****,* ***airframe structural design****, or* ***material selection****?*   ***2. Desired Functionalities****: Let’s now consider the primary functionalities and goals. Our objective is to design a technically challenging, autonomy-enabled rescue aircraft. Specifically:*   - *What are the core functionalities you want this rescue aircraft to achieve?*   1. *Autonomous flight capabilities (e.g.,* ***GPS navigation****,* ***obstacle avoidance****).*   2. *Safe and simple-to-use* ***user interface****.*   3. ***Storage and transport*** *capacity for rescue equipment.*   4. *Fast* ***response*** *time and* ***endurance*** *for prolonged flight.* - *Are there any specific key requirements, such as:*   1. *Size and weight constraints?*   2. *Emergency landing features?*   3. *High endurance capabilities?*   ***3. Special Requirements****: Next, let’s consider any specific requirements or constraints:*   - *Do you have a defined* ***budget range****?* - *Are there particular* ***material preferences****, such as eco-friendly or recyclable materials?* - *Are there any regulatory or environmental conditions that must be considered?* - *What rescue scenarios and harsh environmental factors are you targeting, and how will they impact the design?*   ***4. Inspiration and References****: Do you have any inspirations or references that can help us understand your vision?*   - *Are there existing* ***rescue aircraft*** *or similar equipment you have in mind?* - *Are there specific* ***design styles****, successful case studies, or functional implementations you would like us to incorporate?*   ***5. Existing Challenges****: Let’s consider potential challenges during the design process:*   - *Are there* ***technical difficulties*** *such as the complexity of building autonomous flight systems?* - *Are there* ***manufacturing constraints*** *or limitations?* - *How might* ***market trends*** *and* ***user demands*** *affect the design? How can we overcome these challenges?*   ***Additional Considerations****:*   - ***Target Users****: Who is the primary user group for this rescue aircraft? Will it serve* ***government rescue teams****,* ***civil organizations****, or industries with specific needs?*   - *Understanding users’ needs, such as their technical capabilities or ease-of-maintenance expectations, can help refine the design’s functionalities.* - ***Market Demand****: Are there existing rescue aircraft solutions in the market? What are their functional features, and how will your design stand out?*   - *What are the* ***unique selling points*** *or value propositions of your design?*   *Through these focused questions, we can comprehensively understand your design requirements and formulate a more detailed design proposal. Please address each question step by step so we can proceed to the [Customer Requirements List] module and formalize your needs.* |
| --- |

Effectiveness Analysis

The optimized response demonstrates significant improvements in structure, depth, and user engagement compared to earlier outputs at varying temperature levels. By adopting a Chain-of-Thought framework and fine-tuning the temperature to an optimal setting of 5, the response achieves a well-balanced progression, guiding users through the design process effectively.

Structured Guidance: The refined structure introduces a logical sequence of steps, including Design Field, Functionalities, Special Requirements, Inspirations, and Challenges, ensuring that each phase of the design consultation unfolds naturally. Unlike responses at temperature 0, which were overly rigid and constrained to repetitive clarifications, the optimized version incorporates a conversational yet methodical tone. This progression allows users to explore their design vision step by step, with prompts that encourage deeper reflection and actionable insights. For instance, sub-questions under “Desired Functionalities” prompt the user to detail autonomy levels, safety considerations, and operational constraints, advancing the discussion beyond surface-level queries.

Exploratory Depth: The optimized response also strikes a balance between exploration and coherence. Compared to outputs at temperature 10, which tended to be verbose and occasionally inconsistent, the refined version remains focused and avoids redundancy. This clarity is particularly evident in the sections addressing Special Requirements and Existing Challenges, where the questions are detailed yet tailored, ensuring relevance to the rescue aircraft scenario.

User Engagement and Customization: Moreover, the tone of the response fosters user engagement by reducing potential hesitation, especially for first-time users. Supportive language, such as “Let’s work together step by step to clarify your requirements,” creates an approachable and collaborative interaction. The inclusion of specific design requirements—such as environmental conditions, regulatory considerations, and user constraints—further enhances the consultation's customization, aligning the content closely with the task description.

Overall, the optimization delivers a response that is structured, detailed, and user-centered, effectively balancing creativity and precision. The improvements address the limitations observed in earlier outputs, ensuring that iDesignGPT can guide users through complex design tasks with clarity and coherence.

Supplementary Figure S1. Visualization of the design challenges, highlighting their diversity across key dimensions


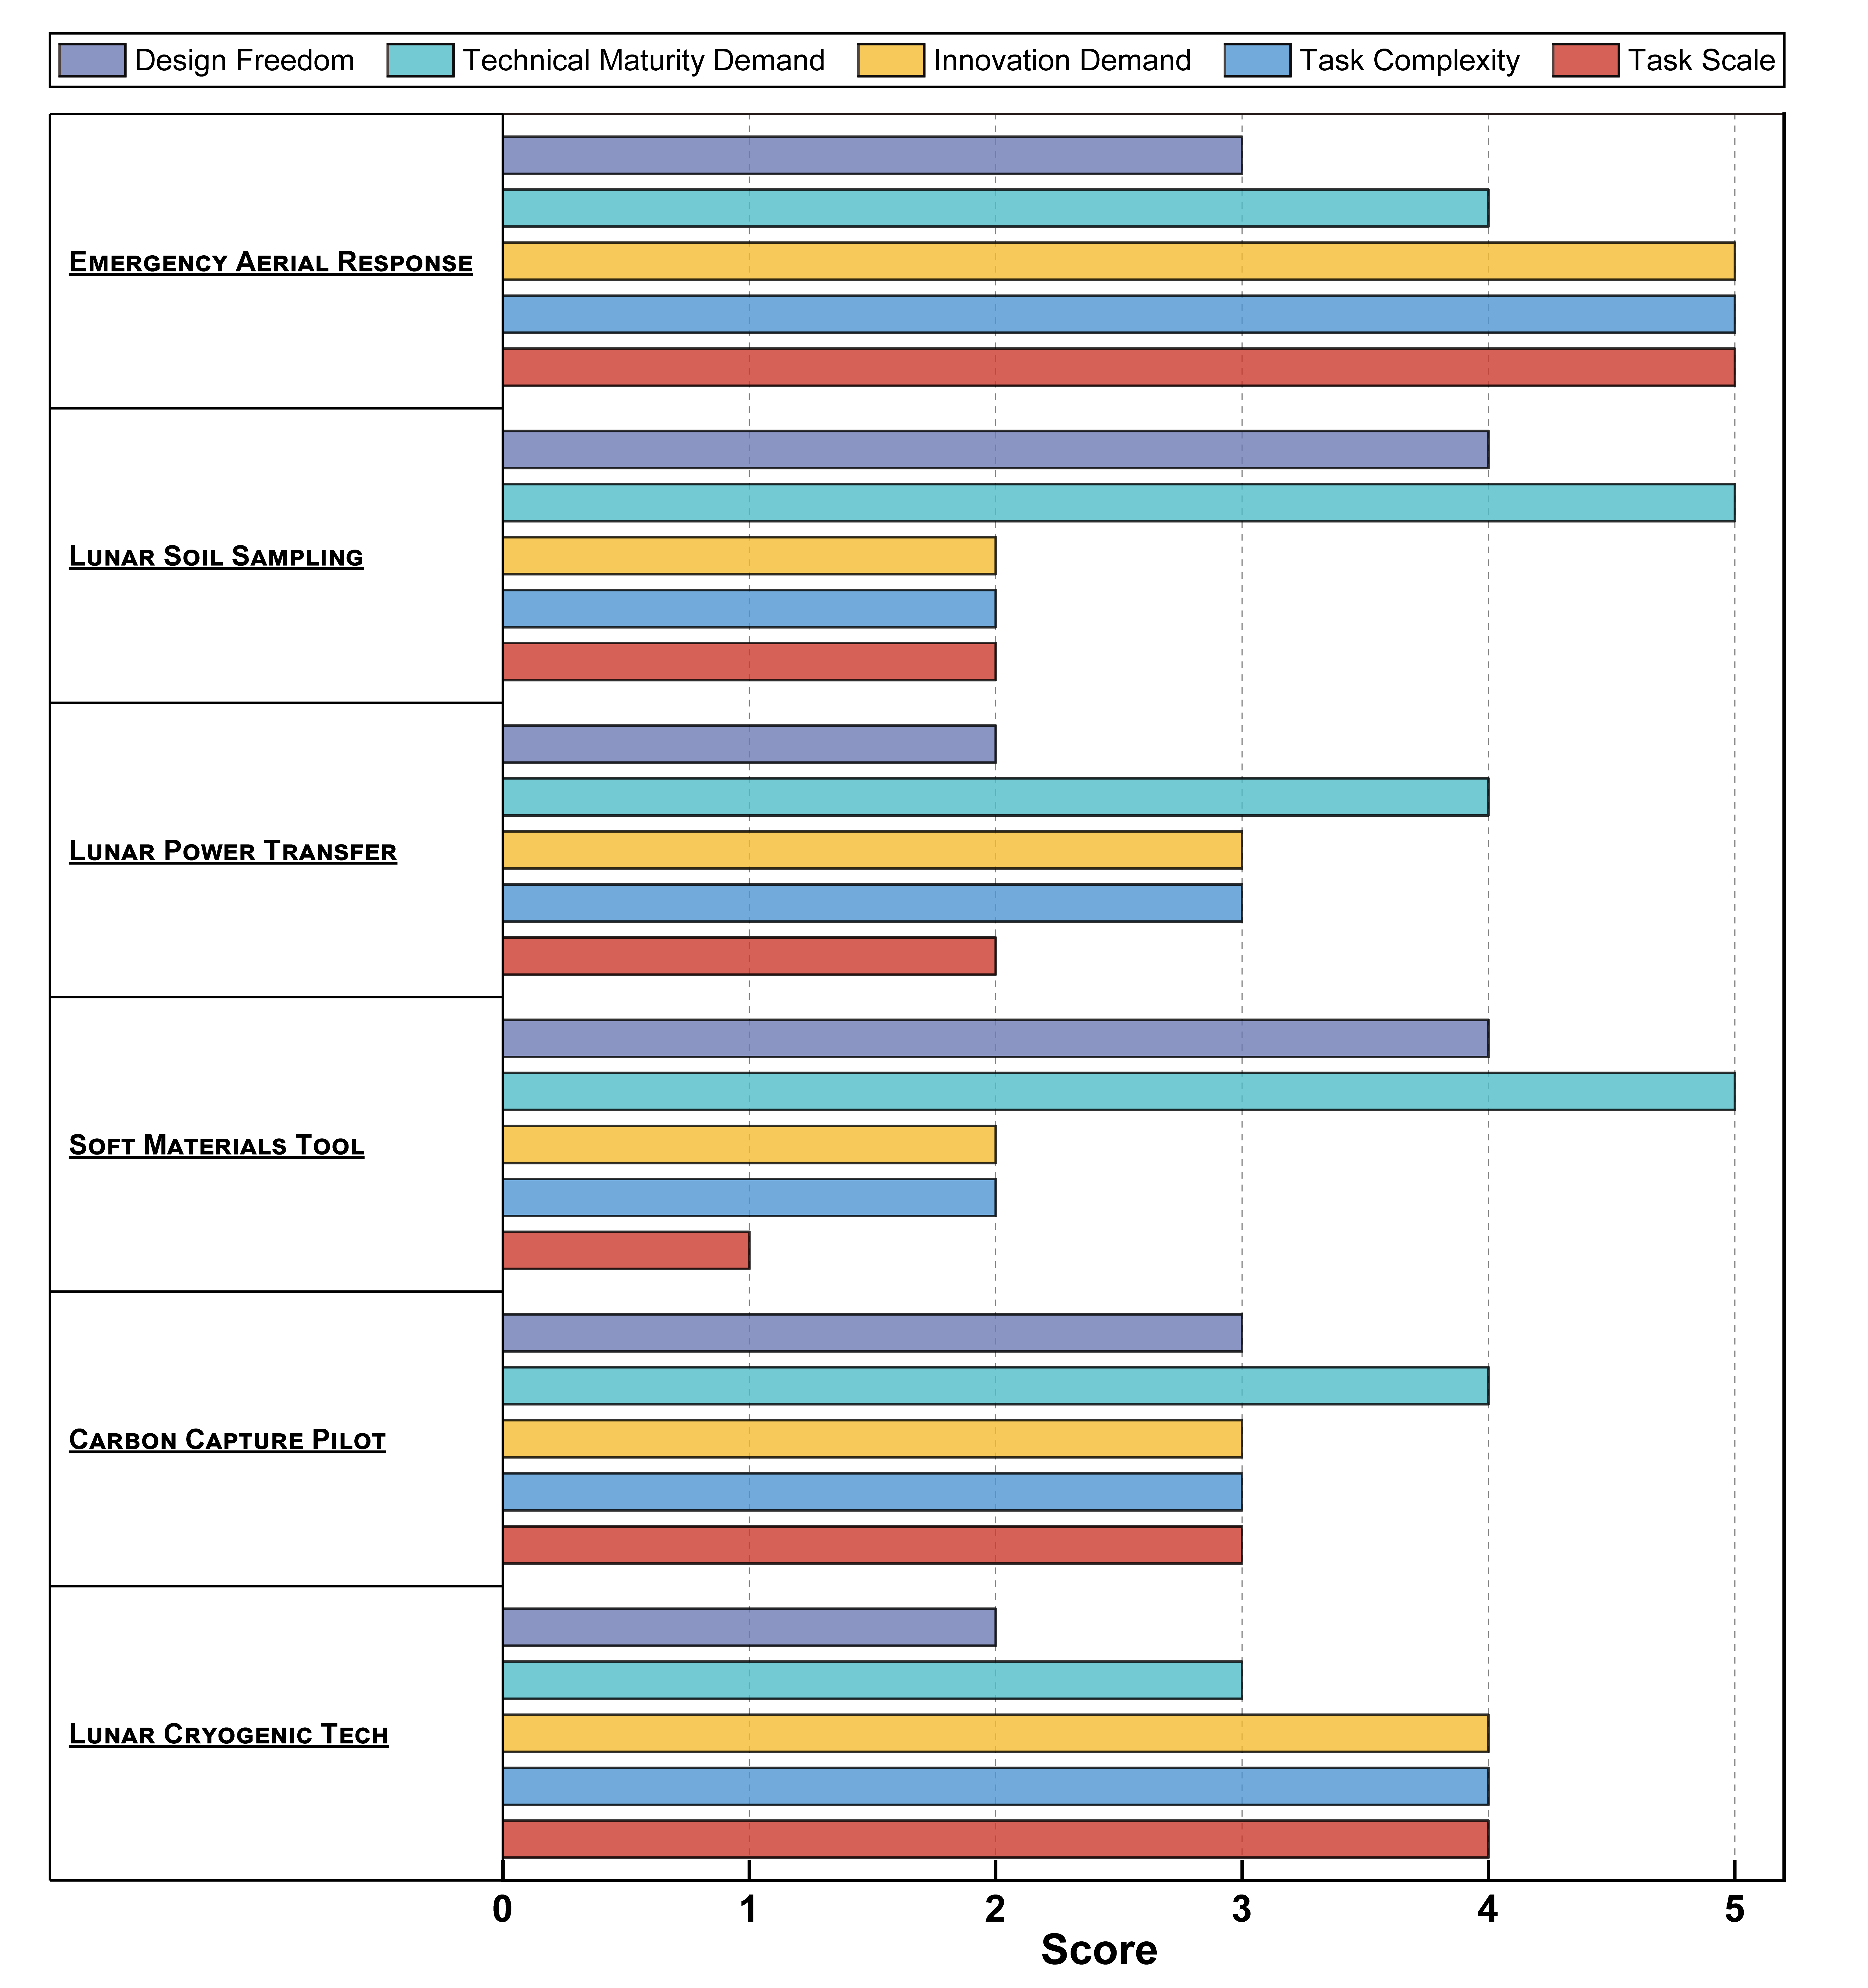


Figure S1. Visualization of the design challenges, highlighting their diversity across key dimensions.

Supplementary Figure S2. Example scoring template used for evaluating iDesignGPT’s generated designs





Figure S2. Example scoring template used for evaluating iDesignGPT’s generated designs.

Supplementary Figure S3. Star Flow Implementation for Brainstorming


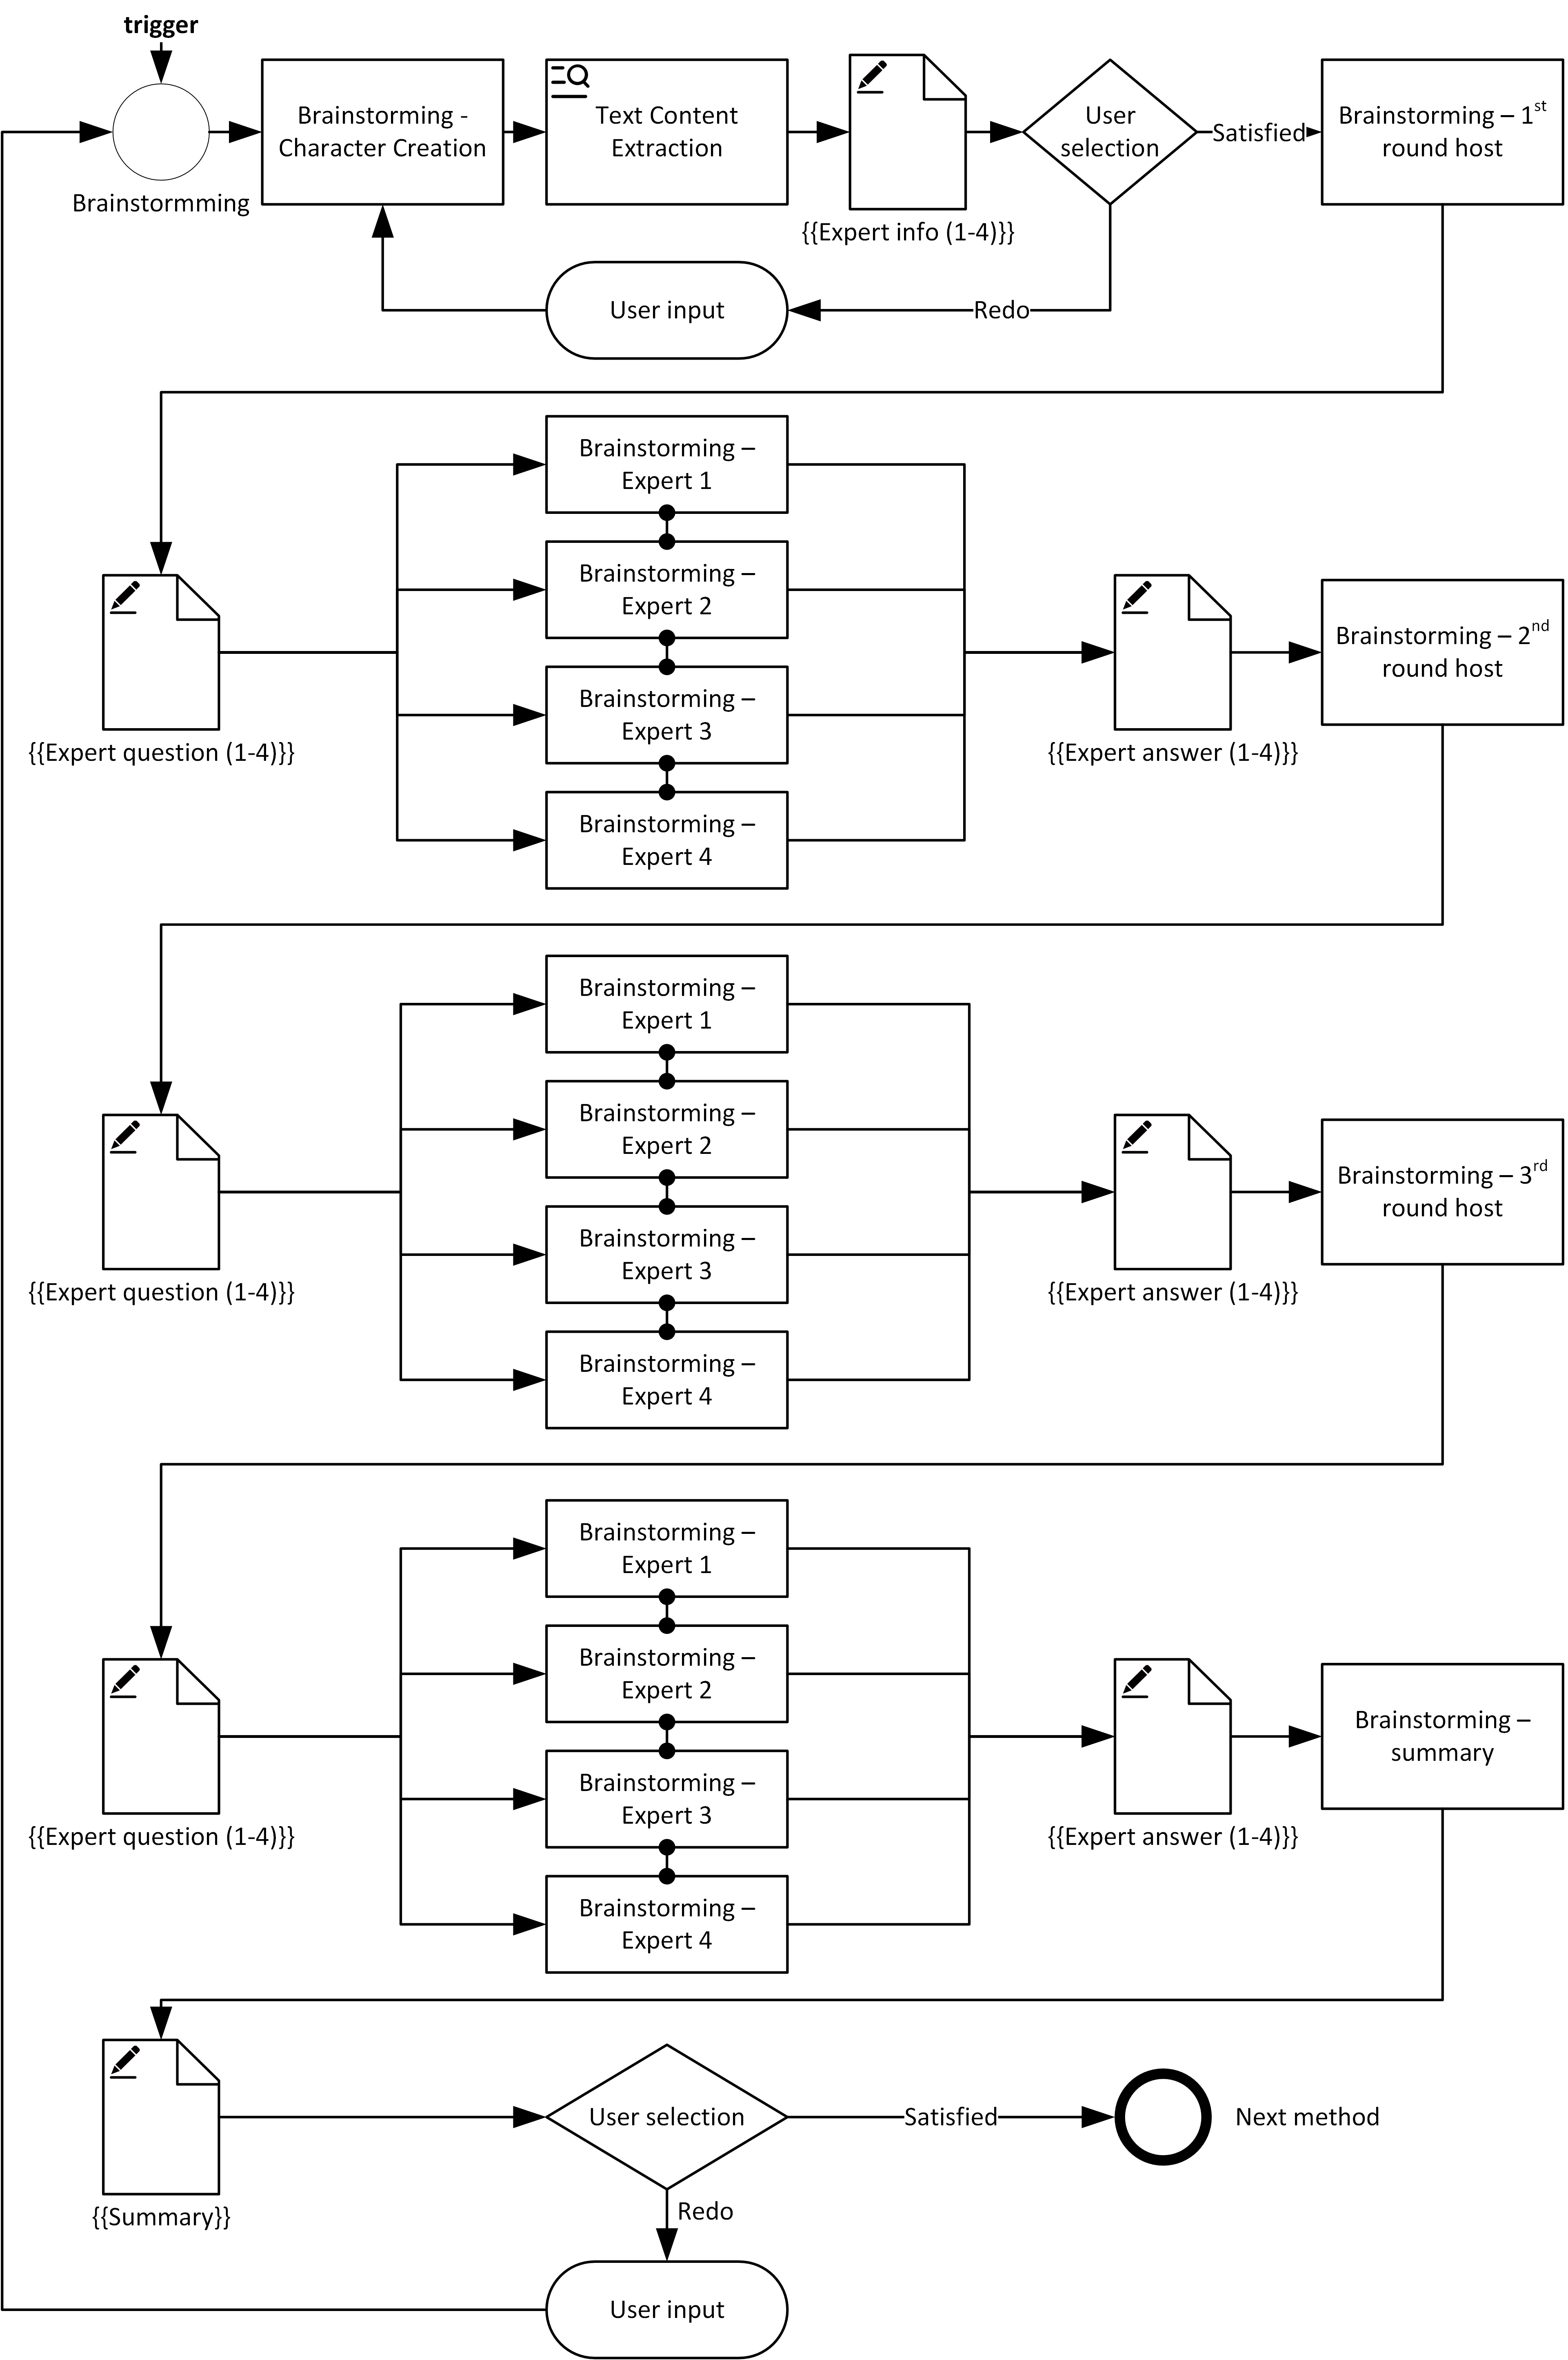


Figure S3. Star Flow Implementation for Brainstorming.

Supplementary Figure S4. Loop Flow Implementation for Functional Decomposition


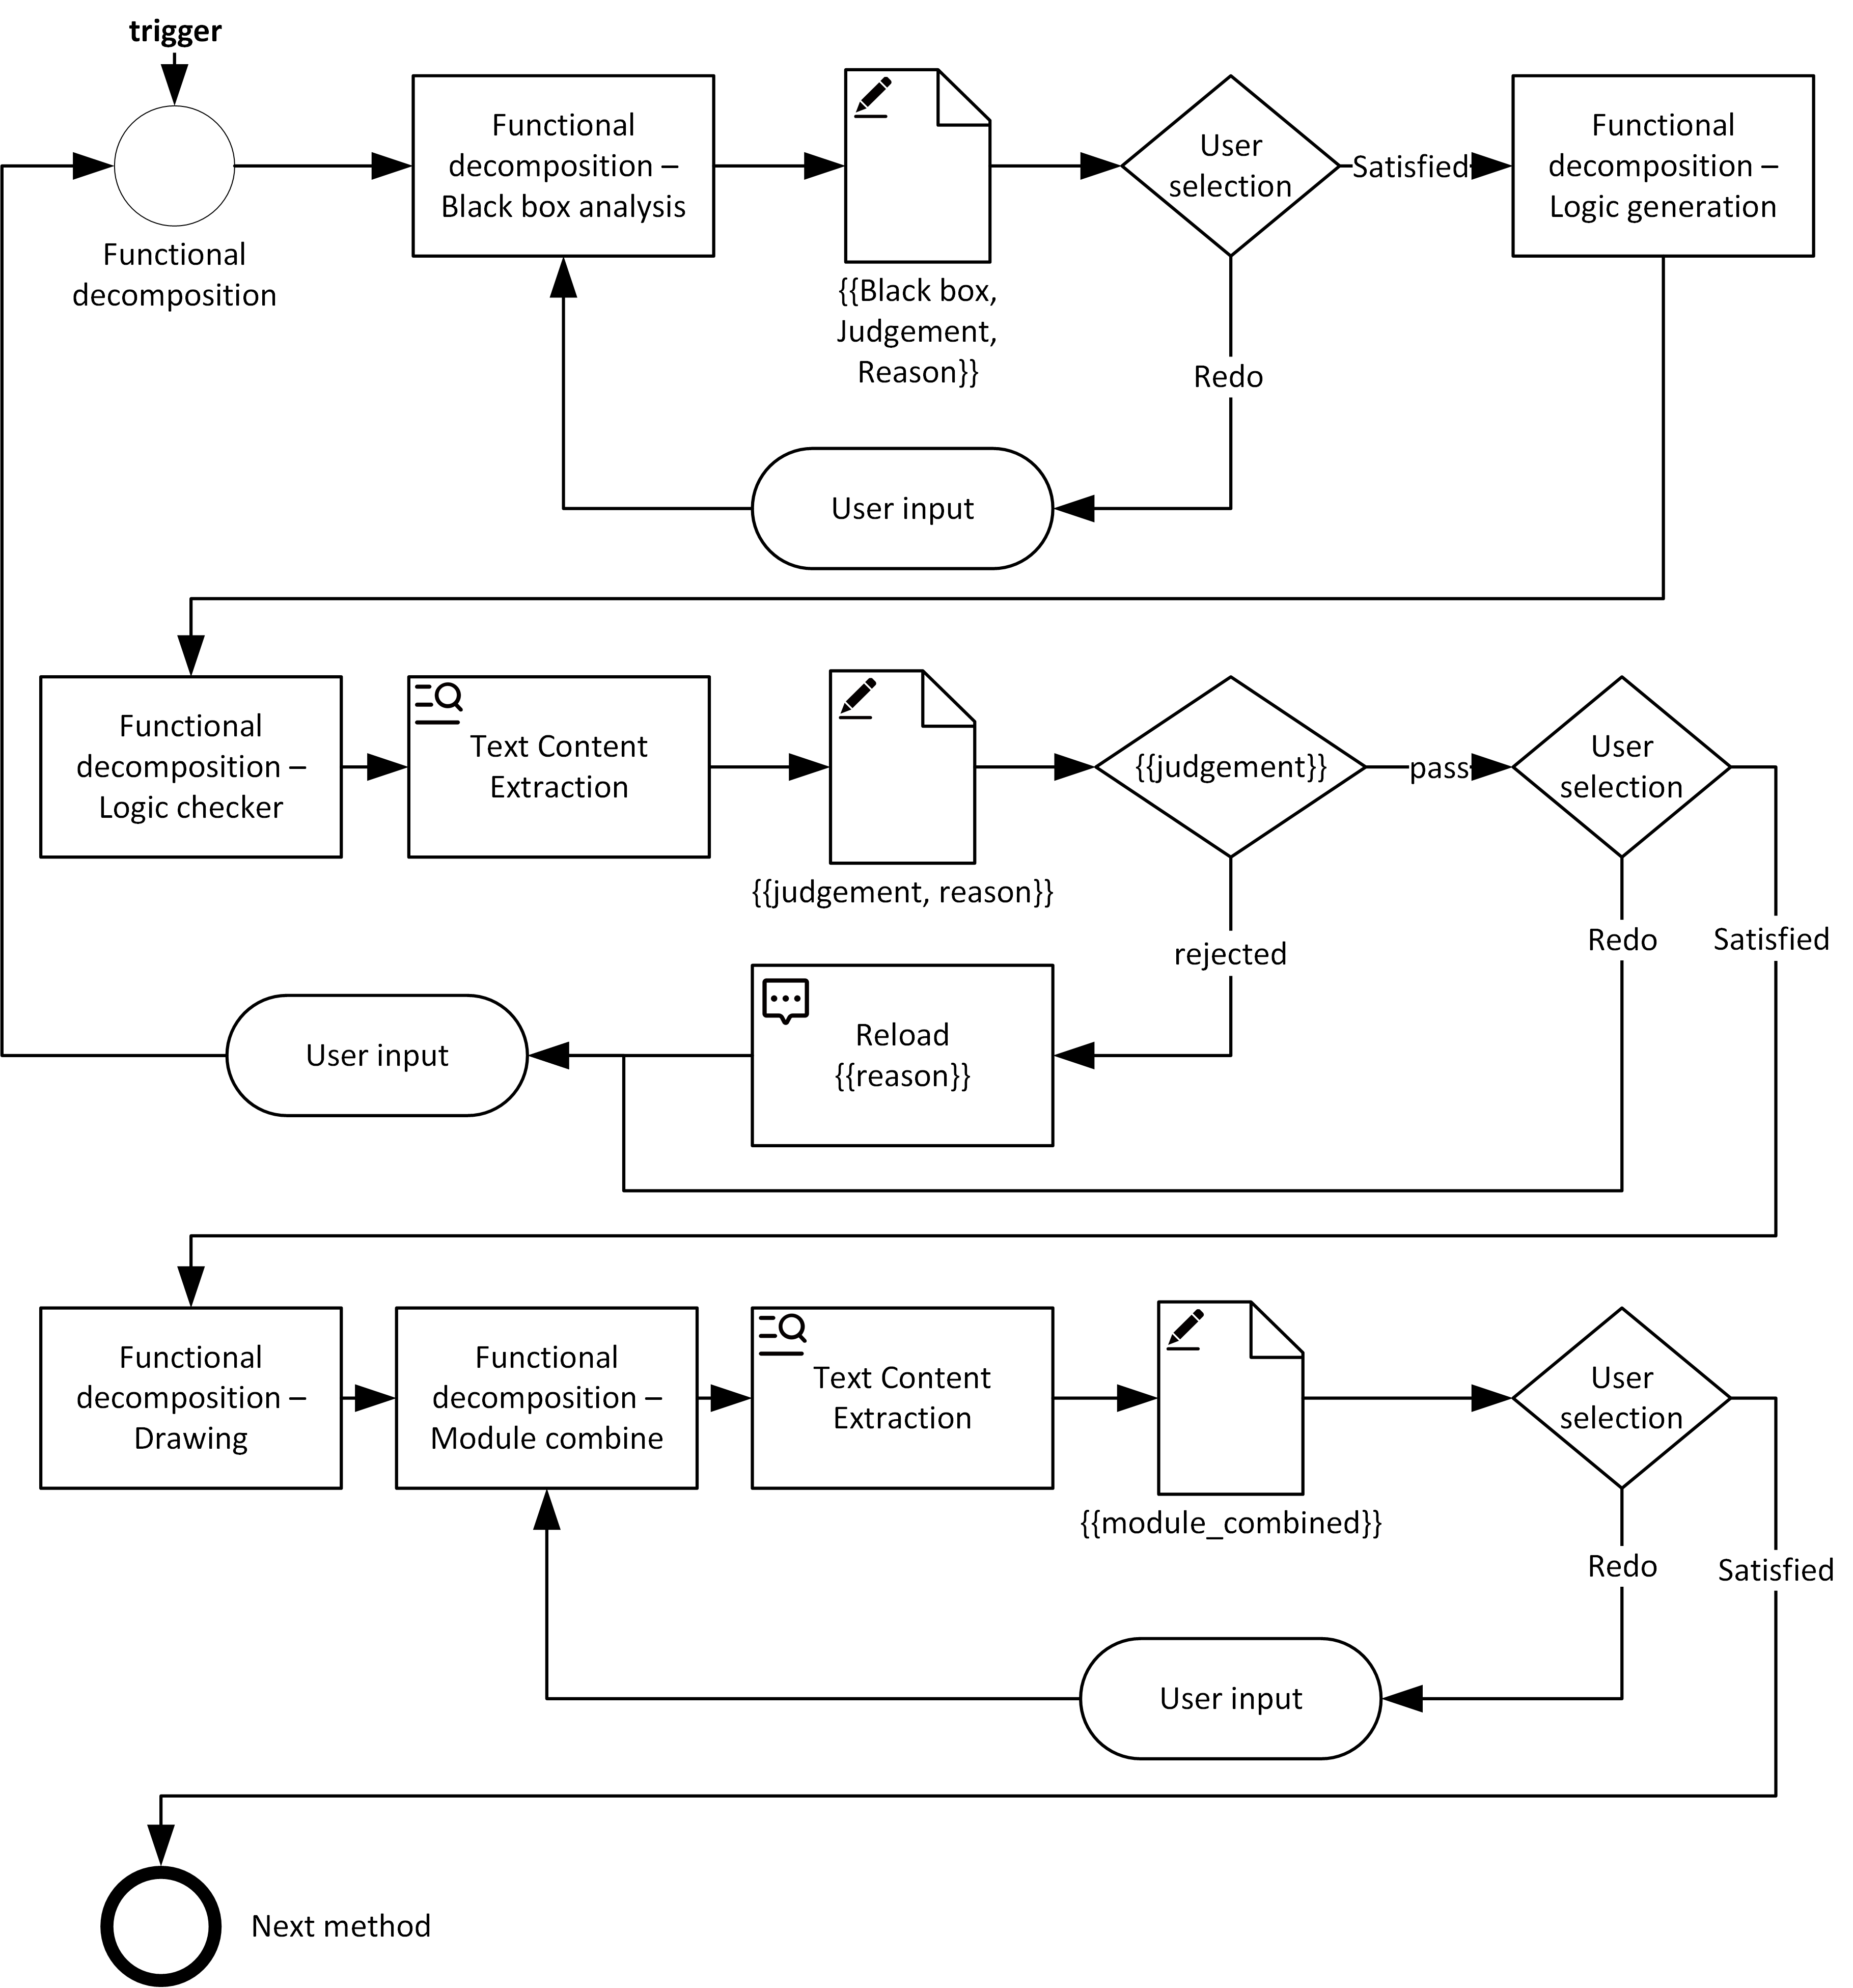


Figure S4. Loop Flow Implementation for Functional Decomposition.

Supplementary Figure S5. Sequential Flow Implementation for TRIZ Conflict Resolution


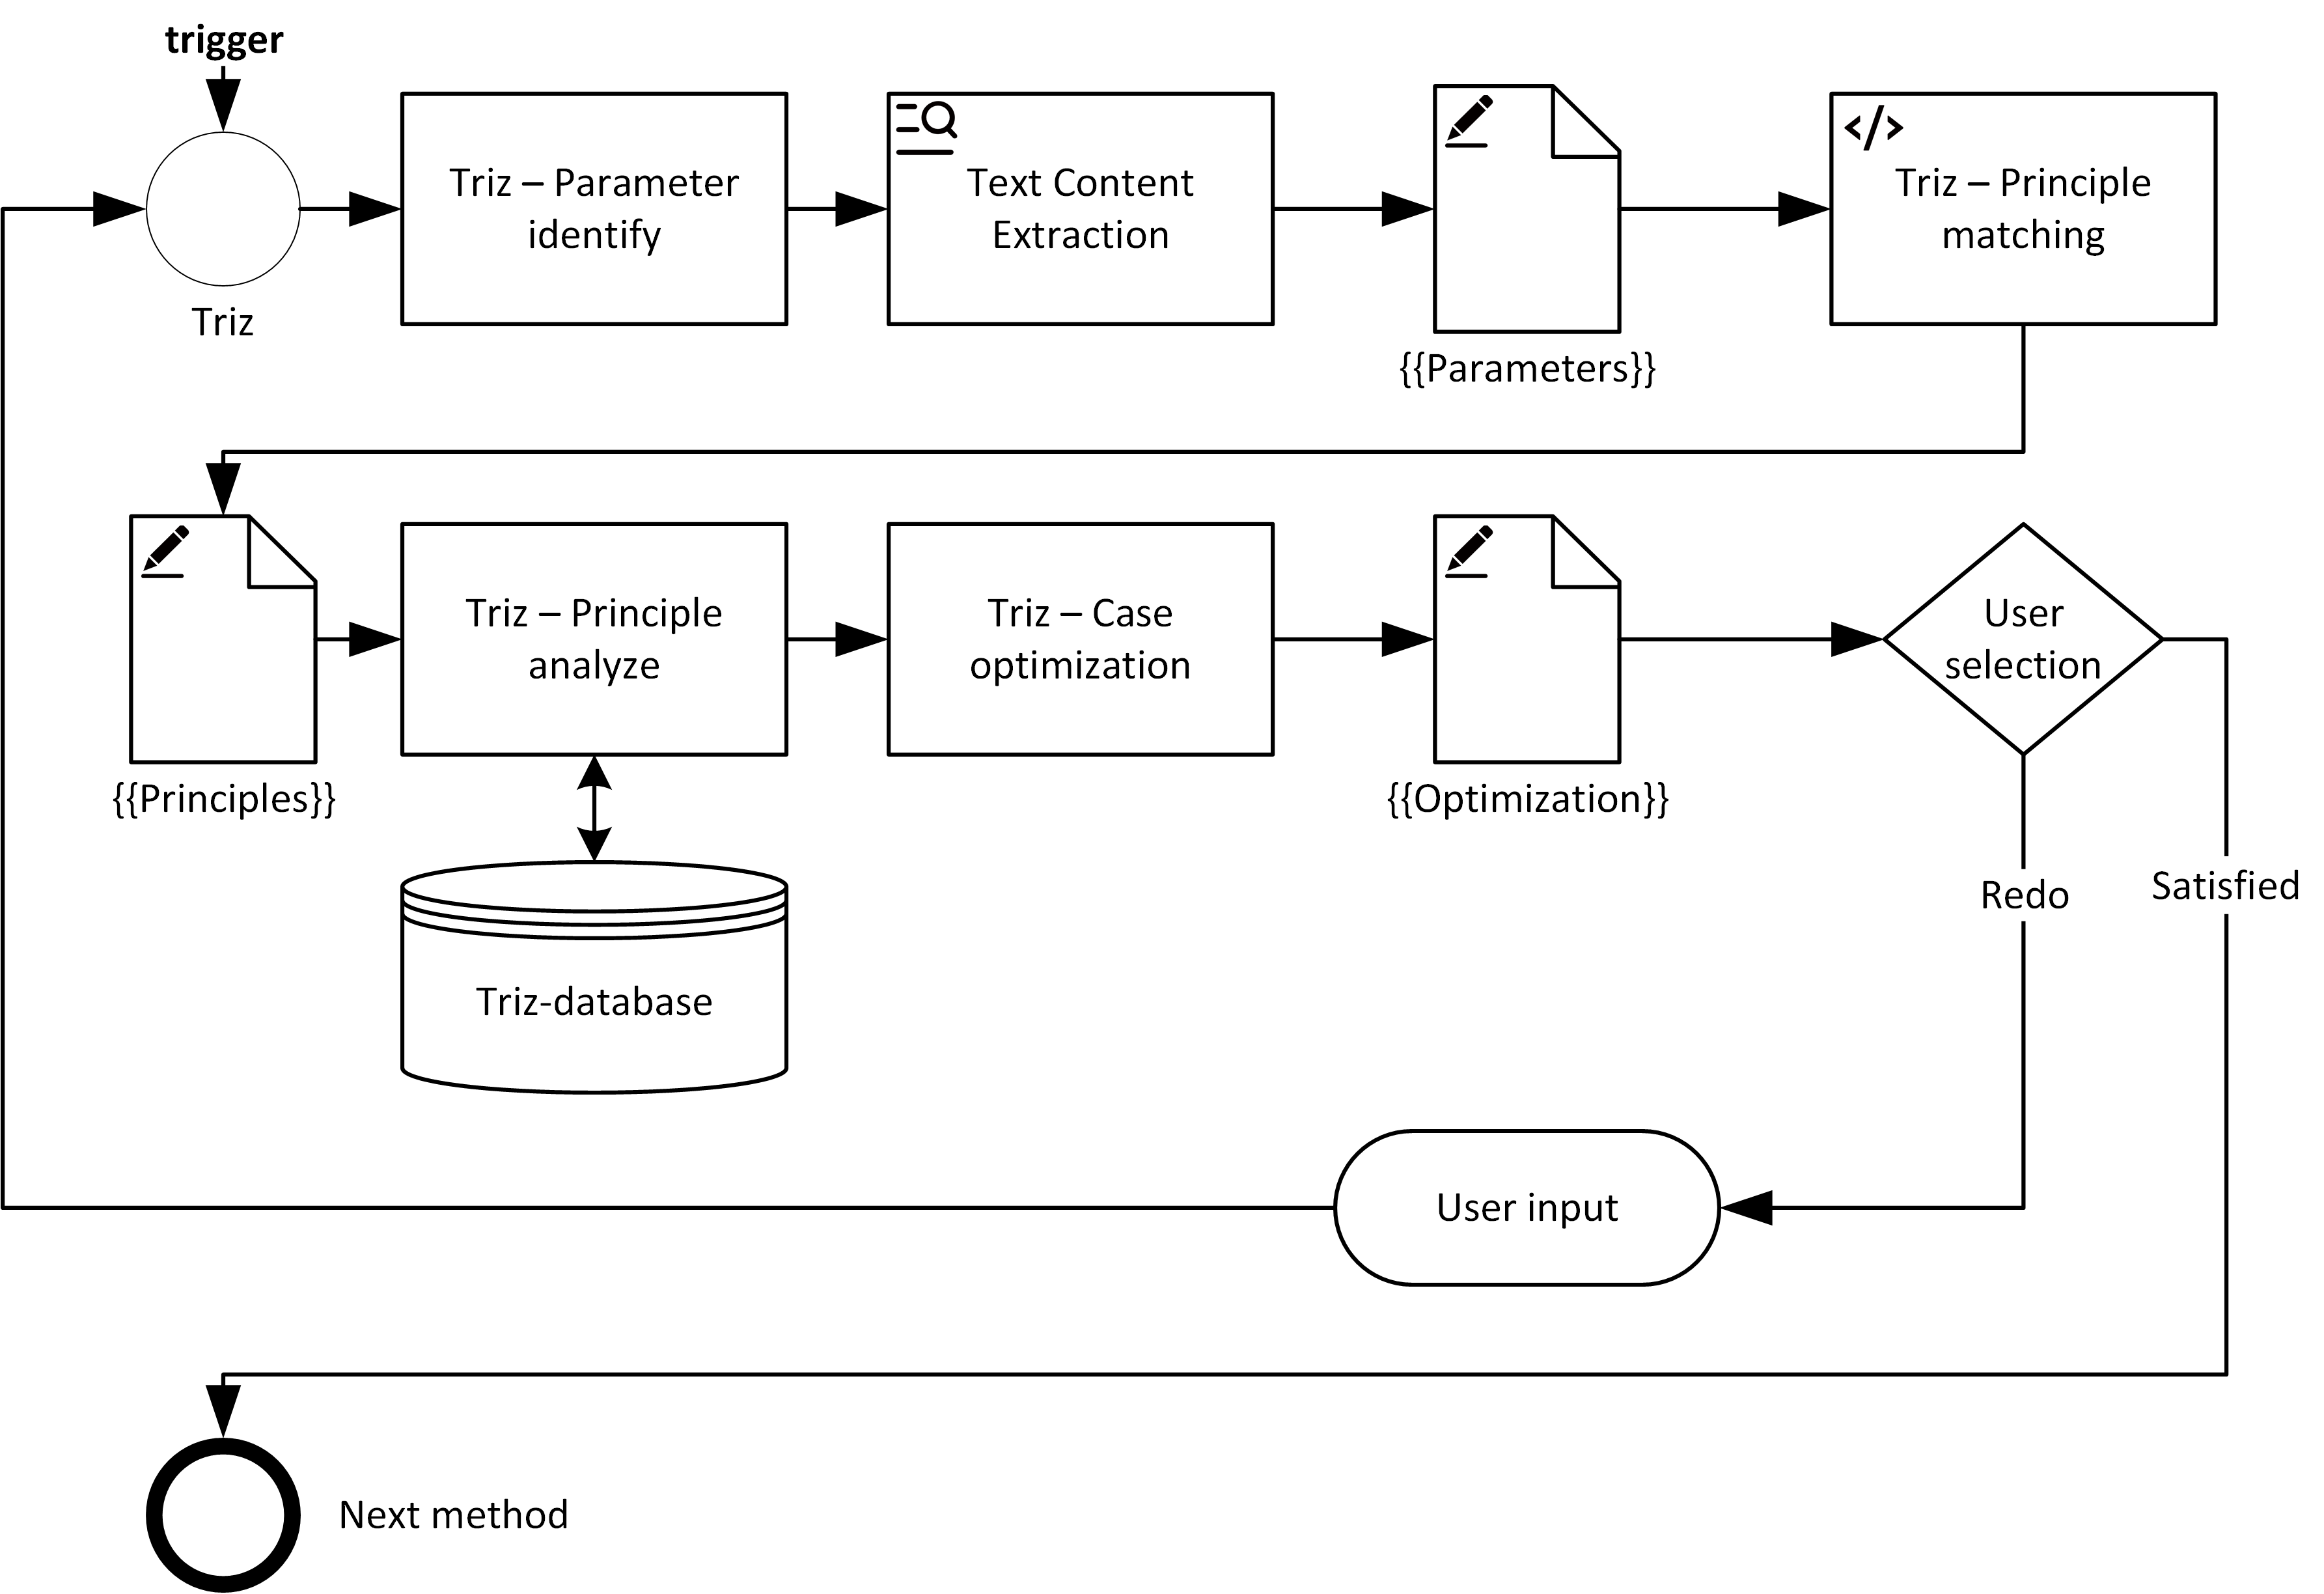


Figure S5. Sequential Flow Implementation for TRIZ Conflict Resolution.

Supplementary Table S1. Summary of the six selected design challenges

| **Abbr. in main text (Fig. 5)** | **Full titles** | **Affiliated organizations** | **Links** |
| --- | --- | --- | --- |
| Emergency Aerial Response | GoAERO aircraft design challenge | Boeing | https://www.herox.com/goaero |
| Carbon Capture Pilot | Commercial Direct Air Capture Pilot Award | DOE | https://americanmadechallenges.org/challenges/direct-air-capture/commercial |
| Soft Materials Tool | 2025 Micro-g NExT Challenge - Microgravity Operations - Soft Material Joining Devices | NASA | https://stemgateway.nasa.gov/s/course-offering/a0BSJ000000BUkL/microg-next-2025-softgoods-attachment-device |
| Lunar Soil Sampling | 2025 Micro-g NExT Challenge Challenge-Lunar Operation-Contact Sampling Device | NASA | https://stemgateway.nasa.gov/s/course-offering/a0BSJ000000BUPN/microg-next-2025-contact-sampling-device |
| Lunar Cryogenic Tech | 2025 Human Lander Challenge (HuLC) Design Challenge | NASA | https://hulc.nianet.org/ |
| Lunar Power Transfer | Lunar Electricity Challenge | NASA | https://www.nasa.gov/prizes-challenges-and-crowdsourcing/centennial-challenges/watts-on-the-moon-challenge/ |

Table S1. Summary of the six selected design challenges

Supplementary Table S2. Expert profiles

| **No.** | **Position** | **Design experience** | **Current industries** | **Qualifications** |
| --- | --- | --- | --- | --- |
| 1 | technical expert | 5 years | artificial intelligence | graduate |
| 2 | senior engineer | 17 years | rotor dynamics | graduate |
| 3 | chief technology officer | 28 years | industrial design | undergraduate |
| 4 | founder | 13 years | mechanical engineering | graduate |
| 5 | assistant research fellow | 8 years | tribological design | PhD |
| 6 | PhD candidate | 4 years | design theory | graduate |

Table S2. Expert profiles

Supplementary Table S3. Participant Information Summary

| **No.** | **Role** | **Proposed Task** | **Total Score** | **Qualitative Evaluation** |
| --- | --- | --- | --- | --- |
| **1** | Graduate Student | Design an algorithm to extract all features of a ship's piping layout, including identification, classification, geometric analysis, layout optimization, and conflict detection. | 48 | Excessive output makes it difficult to identify key points to focus on. |
| **2** | Ph.D Student | Design an ultra-long-range electric vehicle capable of achieving over 2,000 kilometers of range, with a focus on battery technology, fast charging, energy management, and intelligent systems integration. | 64 | The system provides too much information, leading to information overload. Reducing redundancy in dialogue would improve usability. |
| **3** | Ph.D Student | Design a friction testing machine capable of reciprocating shaft rotation under a fixed sleeve, applying 20–500N load, maintaining temperatures (room temperature to 400°C), and monitoring real-time torque with precise control. | 57 | Lengthy text responses are difficult to keep up with. |
| **4** | Ph.D Student | Design a sliding bearing friction and wear testing machine with a small integrated generator load, compact size (<1.5m), capable of monitoring speed, torque, vibration, temperature, current, sound, and oil abrasive particles. | 67 | The function block diagram generation and self-linking analysis were very interesting and helpful. |
| **5** | Ph.D Student | Design a high-precision sensing system for gas turbine hot-end components, capable of withstanding temperatures up to 1000°C, achieving accuracy <0.01, with real-time feedback/storage and compact size (<10kg). | 64 | Generated diagrams for functional structures and black-box analysis were somewhat confusing. |
| **6** | Engineer | Design a pet grooming brush for cats and dogs that collects and discharges hair automatically, minimizes finger/wrist effort, and ensures pet comfort and cleanliness through ergonomic and aesthetic design. | 65 | The interim output reports had low readability in terms of format. |
| **7** | Ph.D Student | Design a miniature cell sorting device with high throughput, purity, and recovery rate, focusing on automation, ease of operation, and adaptability to environmental and regulatory requirements. | 64 | Provided significant guidance for designing complex electromechanical and biological control systems. |
| **8** | Ph.D Student | Design a flexible sweat sensor with skin adherence and wireless transmission capabilities to monitor sweat composition, provide health insights, and deliver actionable recommendations. | 58 | Concepts introduced in the biomimetic design section were particularly inspiring and helped uncover previously overlooked design directions. |
| **9** | Researcher | Design a fretting fatigue testing device for detachable mortise and tenon joints, specifically engine tenon structures, focusing on precise friction load and pressure measurements under simulated operating conditions. | 47 | Adding an auto-results generation button would improve efficiency by avoiding step-by-step user input. |
| **10** | Undergraduate | Design a manually operated road cleaner that maintains environmental cleanliness without causing significant pollution, conserving energy, and ensuring easy maintenance by avoiding the use of electric motors, diesel engines, or similar power sources. | 55 | The [Customer Requirements List] module was particularly inspiring, enabling me to evaluate customer needs comprehensively and expand my thinking. |
| **11** | Undergraduate | Design an electrostatic adsorption device for capturing A4 paper, focusing on optimizing charge control, ensuring precise operation, avoiding static interference, and incorporating intelligent control and material innovations. | 59 | The biomimetic design section provided significant inspiration for the design. |

**Table S3.** Participant Information Summary

References

1. Reimers, N. Sentence-BERT: Sentence Embeddings using Siamese BERT-Networks. *arXiv preprint arXiv:1908.10084* (2019).

2. McInnes, L., Healy, J. & Melville, J. Umap: Uniform manifold approximation and projection for dimension reduction. *arXiv preprint arXiv:1802.03426* (2018).

3. Cherry, E. & Latulipe, C. Quantifying the creativity support of digital tools through the creativity support index. *ACM Transactions on Computer-Human Interaction (TOCHI)* **21**, 1–25 (2014).

4. Hart, S. G. NASA-task load index (NASA-TLX); 20 years later. in *Volume. 50: Proceedings of the human factors and ergonomics society annual meeting* 904–908 (Sage publications Sage CA: Los Angeles, CA, USA, 2006).

5. Bonnardel, N. & Didier, J. Brainstorming variants to favor creative design. *Applied ergonomics* **83**, 102987 (2020).

6. Fiorineschi, L., Frillici, F. S. & Rotini, F. Enhancing functional decomposition and morphology with TRIZ: Literature review. *Computers in Industry* **94**, 1–15 (2018).

7. Ghane, M. *et al.* Semantic TRIZ feasibility in technology development, innovation, and production: A systematic review. *Heliyon* **10**, e23775 (2024).
